# Supplementary material for: Improving oral bioavailability of acalabrutinib using polymer–lipid hybrid nanoparticles: design, optimization, and in vivo pharmacokinetic evaluation
Source: Royal Society of Chemistry journal article supplement (doi:10.1039/d5na00386e), 2025-01-01
Supplement: d5na00386e1.pdf [file d5na00386e1.pdf]

# Improving Oral Bioavailability of Acalabrutinib using Polymer Lipid Hybrid Nanoparticles : Design, Optimization, and in vivo Pharmacokinetic Evaluation.

Swagata Sinha<sup>a</sup>, Punna Rao Ravi<sup>\*a</sup>, Sahadevan Rajesh Rashmi<sup>a</sup>, Lakshmi Koumudi Devaraju<sup>a</sup>

<sup>a</sup>Department of Pharmacy, Birla Institute of Technology and Science Pilani, Hyderabad Campus, Jawahar Nagar, Kapra Mandal, Medchal District, Telangana, INDIA 500078.

## Supplementary Data

### • Implementation of design

The critical factors – polymer to lipid ratio (A); concentration of surfactant (B); speed of homogenization (C); and duration of homogenization (D) affecting the CQAs – PS ( $Y_1$ ); PDI ( $Y_2$ ); and %LE ( $Y_3$ ) were taken up for a circumscribed central composite design (cCCD). The levels of the factors can be described as given in Table S1.

Table S1 : Critical factors, levels, and quality attributes used in the cCCD to optimize preparation of ACP-PLHNs.

| Factor Code                  | Factors & units                  | High Level (+1)       | Low Level (-1) | Alpha high (+ $\alpha$ ) | Alpha low (- $\alpha$ ) | Center point level |
|------------------------------|----------------------------------|-----------------------|----------------|--------------------------|-------------------------|--------------------|
| A                            | Polymer to lipid ratio           | 2.5                   | 1              | 3.25                     | 0.25                    | 1.75               |
| B                            | Concentration of T80 (% w/v)     | 2.0                   | 0.7            | 2.65                     | 0.05                    | 1.35               |
| C                            | Speed of Homogenization (rpm)    | 15000                 | 7500           | 18800                    | 3800                    | 11300              |
| D                            | Duration of Homogenization (min) | 20                    | 10             | 25                       | 5                       | 15                 |
| <b>The CQAs of ACP-PLHNs</b> |                                  |                       |                |                          |                         |                    |
| $Y_1$                        | PS (nm)                          | < 250 nm is desirable |                |                          |                         |                    |
| $Y_2$                        | PDI                              | < 0.6 is desirable    |                |                          |                         |                    |
| $Y_3$                        | %LE                              | > 20% is desirable    |                |                          |                         |                    |

Table S2 : Solubility of ACP in aqueous solutions of different surfactants.

| Surfactant    | Concentration (% w/v) | ACP solubility ( $\mu\text{g/mL}$ ) |
|---------------|-----------------------|-------------------------------------|
| Poloxamer 188 | 2                     | 0.0202                              |
|               | 0.15                  | 0.0075                              |
| Poloxamer 407 | 2                     | 1.7391                              |
|               | 0.15                  | 0.2095                              |

|                       |      |        |
|-----------------------|------|--------|
| Tween 80              | 2    | 0.1941 |
|                       | 0.15 | 0.0523 |
| Polyvinyl alcohol     | 2    | 0.1087 |
|                       | 0.15 | 0.0137 |
| Polyvinyl pyrrolidone | 2    | 2.2728 |
|                       | 0.15 | 0.7479 |

## - Determination of CQAs and critical factors

A number of preliminary trials (Table S3) were conducted to determine the critical factors and their levels affecting the CQAs of ACP-PLHNs.

Table S3 : Preliminary trials to determine the critical factors, their levels affecting the CQAs.

| Batch No. | Method attributes      |                              | High shear homogenizer parameters  | CQAs    |      |       |
|-----------|------------------------|------------------------------|------------------------------------|---------|------|-------|
|           | Polymer to lipid ratio | Concentration of T80 (% w/v) |                                    | PS (nm) | PDI  | %LE   |
| 01-PB     | 1:1                    | 1                            | Speed = 10000 rpm<br>Time = 20 min | 182.5   | 0.35 | 8.68  |
| 02-PB     | 2:1                    |                              |                                    | 208.1   | 0.41 | 10.42 |
| 03-PB     | 3:2                    |                              |                                    | 238.2   | 0.36 | 9.68  |
| 04-PB     | 2:1                    | 0.5                          | Speed = 10000 rpm<br>Time = 20 min | 189.1   | 0.37 | 10.26 |
| 05-PB     |                        | 0.75                         |                                    | 194.7   | 0.39 | 10.47 |
| 06-PB     |                        | 1.5                          |                                    | 247.1   | 0.48 | 9.37  |
| 07-PB     |                        | 2                            |                                    | 287.1   | 0.61 | 8.20  |
| 08-PB     | 2:1                    | 1                            | Speed = 7500 rpm<br>Time = 20 min  | 198.2   | 0.50 | 9.91  |
| 09-PB     |                        |                              | Speed = 12000 rpm<br>Time = 20 min | 219.4   | 0.42 | 10.77 |
| 10-PB     |                        |                              | Speed = 15000 rpm<br>Time = 20 min | 179.4   | 0.41 | 8.93  |
| 11-PB     | 2:1                    | 1                            | Speed = 10000 rpm<br>Time = 10 min | 149.9   | 0.38 | 7.02  |
| 12-PB     |                        |                              | Speed = 10000 rpm<br>Time = 15 min | 130.9   | 0.35 | 8.23  |
| 13-PB     |                        |                              | Speed = 10000 rpm<br>Time = 20 min | 180.7   | 0.45 | 8.94  |

Note: CQAs = critical quality attributes; PS = particle size; PDI = polydispersity index; %LE = loading efficiency. Polymer = Polycaprolactone; Lipid = DPPC and lecithin. Temperature of AP was maintained at 55 °C and the rate of addition of OP to AP was maintained at 0.5 mL/min.

- **Experimental design using DoE**

The accuracy of transformation of PS ( $Y_1$ ); PDI ( $Y_2$ ); and %LE ( $Y_3$ ) could be depicted by their respective Box-Cox power transformation plots (Fig. S1a, S1b, and S1c, respectively).

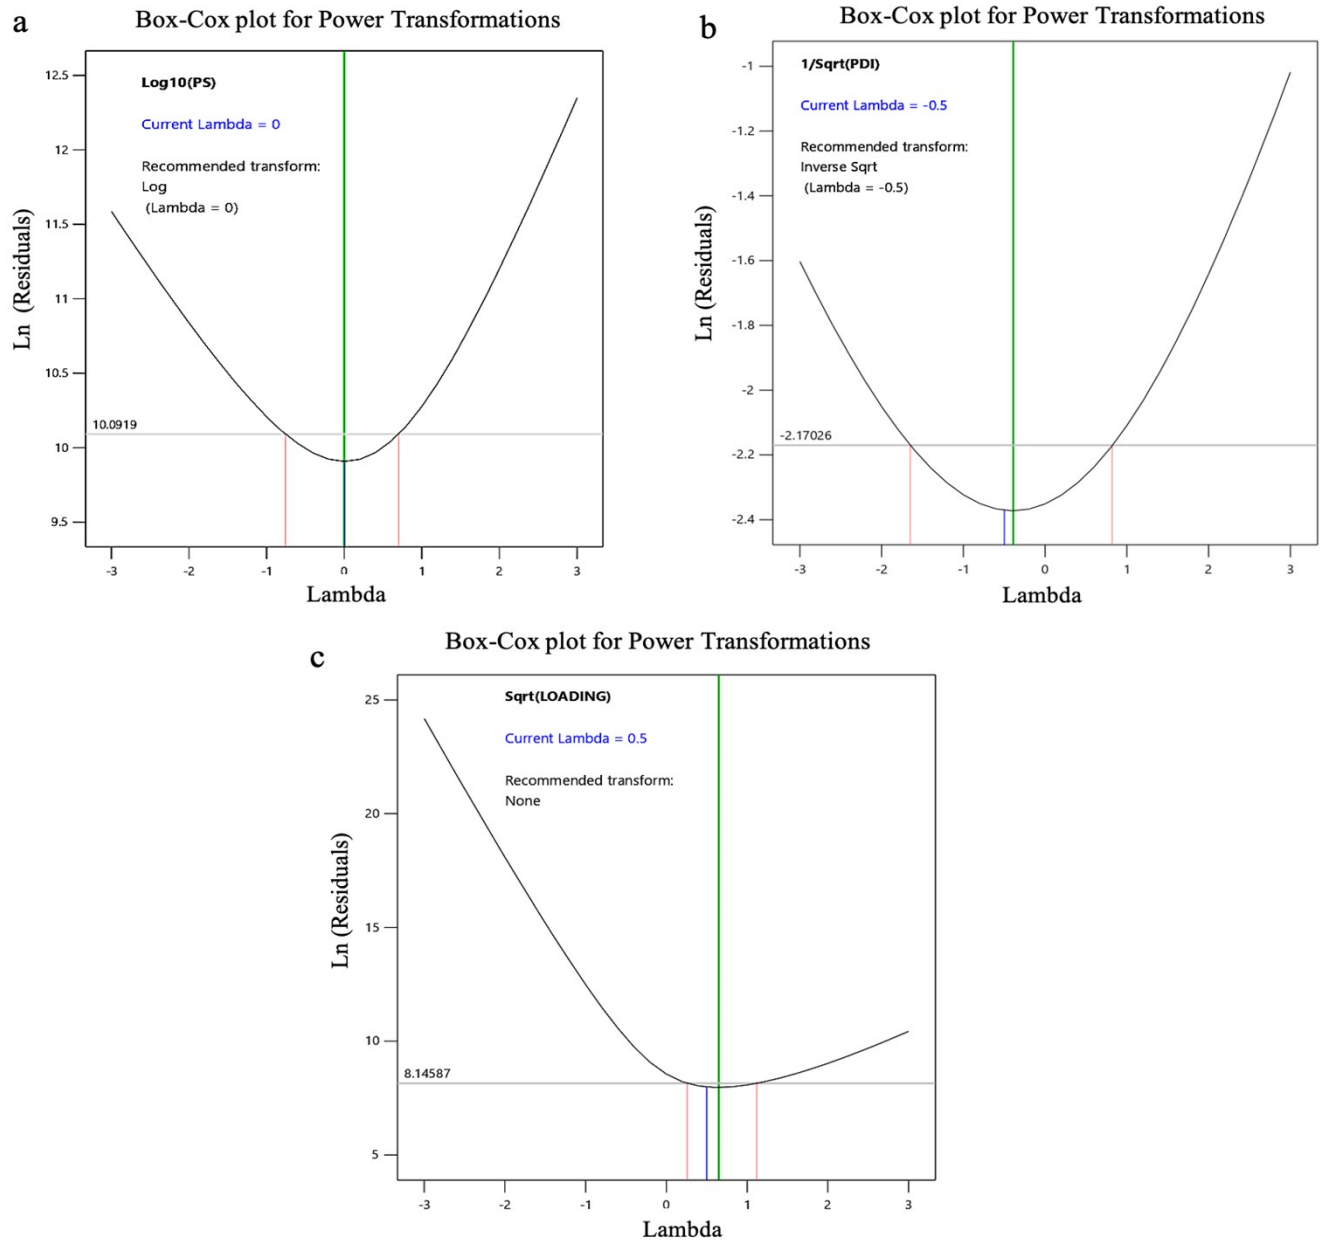

Fig. S1 : The Box-Cox power transformation plots depicting the goodness-of-fit of the selected model for the CRVs – PS (a); PDI (b); and %LE (c).

- Pharmacokinetic profiles of the intravenous ACP solution and conventional ACP suspension (1)

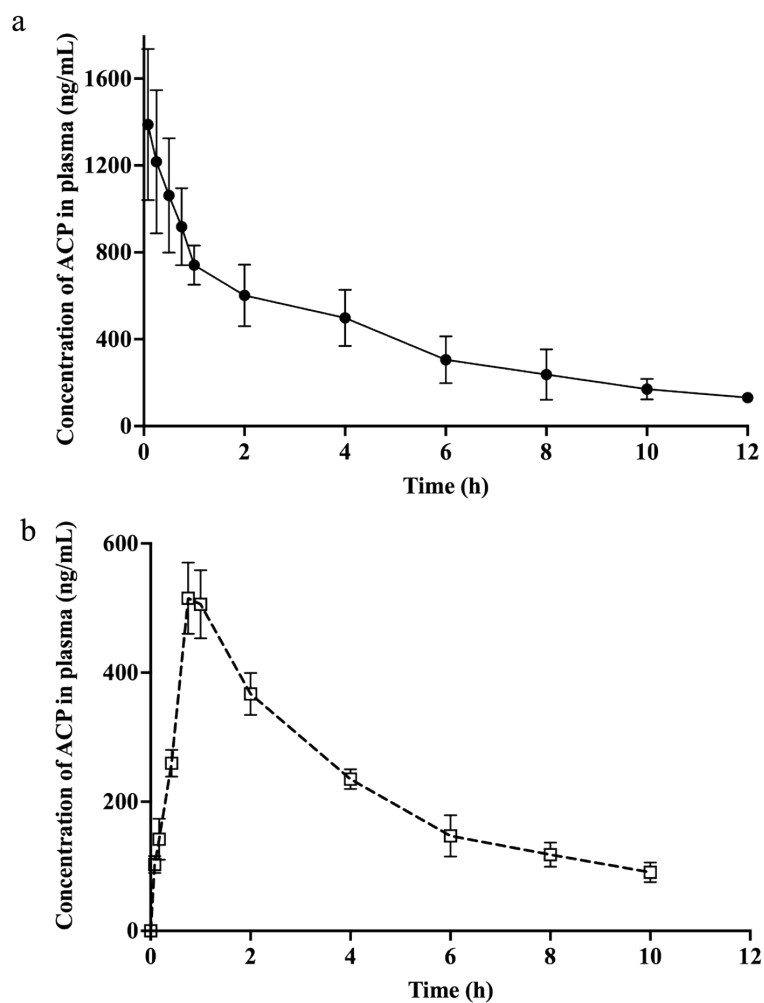

Fig. S2 : *In vivo* PK profile obtained from intravenous administration of ACP solution at the dose of 12 mg/Kg (a) and oral administration of conventional ACP suspension and ACP-PLHNs nanosuspension at the dose of 30 mg/Kg (b) to male wistar rats (n = 3).

## Reference:

1. Sinha S, Ravi PR, Somvanshi M, SR R. Development and validation of a simple HPLC-UV-based bioanalytical method for estimation of acalabrutinib in rat plasma and its application in evaluation of drug loaded nanocrystal formulation. Sep Sci Plus. 2024;
